# Supplementary material for: Vanillic acid activates thermogenesis in brown and white adipose tissue
Source: Royal Society of Chemistry journal article supplement (doi:10.1039/c8fo00978c), 2018-01-01

Supplement. 1. VA not browning eWAT. (A) Immunohistochemistry for UCP1 protein (brown stain) in eWAT sections. (B) mRNA level of thermogenic genes and mitochondria-related gene NRF2 (n=8-12). Data are expressed as mean  $\pm$  SD. Mean values with different letters are significantly different ( $P < .05$ ).  $P$ -value was determined by Kruskal-Wallis test.

Supplement. 1

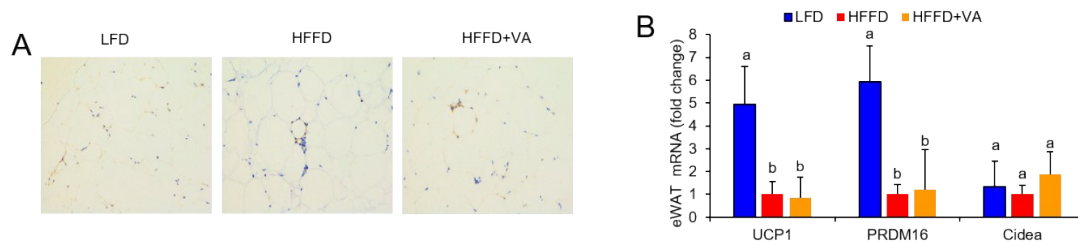

Supplement: c8fo00978c1.pdf [file c8fo00978c1.pdf]
